# Supplementary material for: Enhanced thermoelectric performance of a new half-Heusler derivative Zr9Ni7Sn8 bulk nanocomposite: enhanced electrical conductivity and low thermal conductivity
Source: Royal Society of Chemistry journal article supplement (doi:10.1039/c4ta01380h), 2014-01-01
Supplement: c4ta01380h1.pdf [file c4ta01380h1.pdf]

# Supporting Informations:

Manuscript ID TA-ART-03-2014-001380 entitled “Enhanced Thermoelectric Performance of a New half-Heusler Derivative  $Zr_9Ni_7Sn_8$  Bulk Nanocomposite: Enhanced Electrical Conductivity and Low Thermal Conductivity.

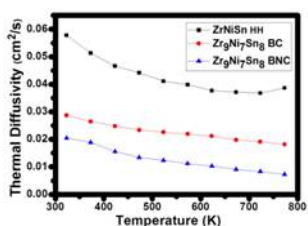

**Figure S1:** Temperature dependence of thermal diffusivity of ZrNiSn normal HH,  $Zr_9Ni_7Sn_8$  bulk composite (BC) and  $Zr_9Ni_7Sn_8$  bulk nanocomposite (BNC).

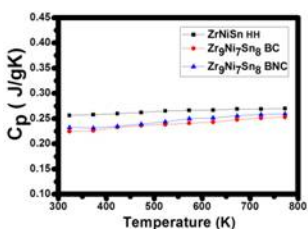

**Figure S2:** Temperature dependence value of specific heat ( $C_p$ ) of ZrNiSn normal HH,  $Zr_9Ni_7Sn_8$  bulk composite (BC) and  $Zr_9Ni_7Sn_8$  bulk nanocomposite (BNC).

**Table T1.** Density of ZrNiSn normal HH,  $Zr_9Ni_7Sn_8$  bulk composite (BC) and  $Zr_9Ni_7Sn_8$  bulk nanocomposite (BNC).

| Composition                  | ZrNiSn HH | $Zr_9Ni_7Sn_8$ BC | $Zr_9Ni_7Sn_8$ BNC |
|------------------------------|-----------|-------------------|--------------------|
| Density (g/cm <sup>3</sup> ) | 7.15      | 7.07              | 7.01               |

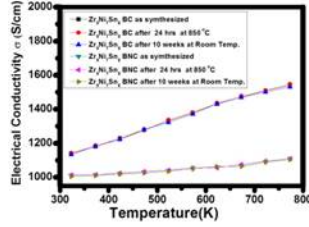

**Figure S3:** Comparison of temperature dependence of electrical conductivity of  $Zr_9Ni_7Sn_8$  bulk composite (BC) and  $Zr_9Ni_7Sn_8$  bulk nanocomposite (BNC) measured for same samples, as-synthesized, after 24 hrs at 850 °C and after 10 weeks at room temperature respectively.

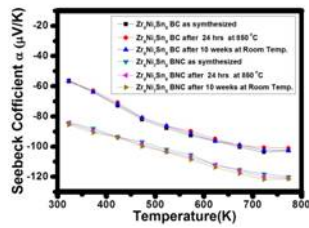

**Figure S4:** Comparison of temperature dependence of Seebeck Coefficient of  $Zr_9Ni_7Sn_8$  bulk composite (BC) and  $Zr_9Ni_7Sn_8$  bulk nanocomposite (BNC) measured for same sample, as-synthesized, after 24 hrs at 850 °C and after 10 weeks at room temperature respectively.
